# Supplementary material
Source: Frontiers journal article supplement (https://www.frontiersin.org/articles/255671)
Supplement: Presentation_1.pdf [file Presentation_1.pdf]

# **Inhibition of Collagen-Induced Platelet Aggregation by the Butanolide Secolincomolide A from *Lindera obtusiloba* Blume**

## **SUPPLEMENTARY INFORMATION**

**Extraction and isolation.** The air-dried stems of *Lindera obtusiloba* Blume (3 kg) was finely sliced and extracted with methanol (MeOH) to 30 times under refluxing. Concentrated MeOH extract (185.3g, 6.1%) was suspended in H<sub>2</sub>O and partitioned with chloroform (CHCl<sub>3</sub>), ethyl acetate (EtOAc), butanol (BuOH), and water (H<sub>2</sub>O), respectively. The CHCl<sub>3</sub> extract (52.4 g) was subjected to silica gel column chromatography with a gradient of *n*-hexane-EtOAc (3:1-1:1) to give 3A fraction. Fraction 3A was further chromatographed on a silica gel column using a gradient of *n*-hexane-EtOAc (8:1-7:1) to give 35D fraction and then chromatographed on a silica gel column with CHCl<sub>3</sub>-MeOH (90:1-70:1) to obtain five subfractions (36A-36E). Subfraction 36A was further purified to silica gel column chromatography with a gradient of CHCl<sub>3</sub>-EtOAc (60:1) to get compound 1 (124.9 mg). Subfraction 36B was chromatographed on a silica gel column with *n*-hexane-Acetone (8:1) to obtain four subfractions (42A-42D), further purification of the subfraction 42D led to compounds 2 (49.9 mg). Subfraction 42A and 47B was further reverse-phase (RP) chromatography column with *MeOH-Acetone-H<sub>2</sub>O* (3:4:1.2) to obtain compounds 3 (34.1 mg) and 4 (22.4 mg). Their structures were elucidated utilizing spectrometric and spectroscopic approaches and relevant reported data.

**Asarinin**, C<sub>20</sub>H<sub>18</sub>O<sub>6</sub>; [ $\alpha$ ]<sub>D</sub><sup>25</sup> +131.31 (c 0.1, CHCl<sub>3</sub>); HR-ESI-MS *m/z* 377.0894 [M+Na]<sup>+</sup> (calcd. for C<sub>20</sub>H<sub>18</sub>O<sub>6</sub>Na : 377.1001) ; IR (transmission)  $\nu_{\text{MAX}}$  2962, 2930, 2867, 1503, 1487, 1438, 1375, 1253, 1179 cm<sup>-1</sup>. <sup>1</sup>H-NMR (400 MHz, CDCl<sub>3</sub>)  $\delta$ : 6.87 (2H, d, *J* = 2.7 Hz, H-

24 2, 2'), 6.82 (2H, d,  $J = 7.9$  Hz, H- 5, 5'), 6.79 (2H, dd,  $J = 7.9, 2.7$  Hz, H-6, 6'), 5.97 (2H, s,  
 25 -OCH<sub>2</sub>O-), 5.95 (2H, s, -OCH<sub>2</sub>O-), 4.83 (1H, d,  $J = 6.5$  Hz, H-7), 4.39 (1H, d,  $J = 6.5$  Hz,  
 26 H-7'), 4.10 (1H, d,  $J = 8.8$  Hz, H-9'b), 3.85 (1H, d,  $J = 8.1$  Hz, H-9b), 3.82 (1H, d,  $J = 8.8$   
 27 Hz, H-9'a), 3.32 (1H, m, H- 8), 3.29 (1H, d,  $J = 8.1$  Hz, H-9a), 2.87 (1H, m, H-8'). <sup>13</sup>C-  
 28 NMR (100 MHz, CDCl<sub>3</sub>)  $\delta$ : 147.9 (C-3'), 147.6 (C-4), 147.2 (C-4'), 146.5 (C-3), 135.1 (C-  
 29 1'), 132.2 (C-1), 119.6 (C-6'), 118.6 (C-6), 108.1 (C-5', C-5), 106.5 (C-2'), 106.4 (C-2),  
 30 101.0 (-OCH<sub>2</sub>O-), 100.9 (-OCH<sub>2</sub>O-), 87.6 (C-7'), 81.9 (C-7), 70.8 (C-9'), 69.6 (C-9), 54.5  
 31 (C-8'), 50.8 (C-8).

32 **Secoisolitsealiicolide B**, C<sub>18</sub>H<sub>30</sub>O<sub>4</sub>; [ $\alpha$ ]<sub>D</sub><sup>25</sup> -52.3 (c 0.3, CHCl<sub>3</sub>); HR-ESI-MS  $m/z$   
 33 333.1964 [M+Na]<sup>+</sup> (calcd. for C<sub>18</sub>H<sub>30</sub>O<sub>4</sub>Na : 333.2042); IR (transmission)  $\nu_{\text{MAX}}$  3401, 1733  
 34 cm<sup>-1</sup>. <sup>1</sup>H-NMR (600 MHz, CDCl<sub>3</sub>)  $\delta$ : 7.08 (1H, t,  $J = 7.6$  Hz, H-6), 5.81 (1H, ddt,  $J = 17.4$ ,  
 35 10.5, 6.9 Hz, H-16), 4.99 (1H, dd,  $J = 17.4, 1.7$  Hz, H-17a), 4.93 (1H, dd,  $J = 10.5, 1.7$  Hz,  
 36 H-17b), 4.90 (1H, s, H-3), 4.03 (1H, s, 3-OH), 3.73 (3H, s, 1- OCH<sub>3</sub>), 2.16 (3H, s, H-5),  
 37 2.35 (2H, q,  $J = 7.6$  Hz, H-7), 2.04 (2H, q,  $J = 6.9$  Hz, H-15), 1.52 (2H, m, H-8), 1.28 (12H,  
 38 br s, H-9 ~ H-14). <sup>13</sup>C-NMR (150 MHz, CDCl<sub>3</sub>)  $\delta$ : 206.5 (C-4), 166.6 (C-1), 149.2 (C-6),  
 39 139.2 (C-16), 129.8 (C-2), 114.2 (C-17), 73.4 (C-3), 52.0 (1-OCH<sub>3</sub>), 33.7(C-15), 29.5 ~  
 40 28.7\* (C-9 ~ C-14), 28.8 (C-7), 28.6 (C-8), 24.9 (C-5).

41 **Secolincomolide A**, C<sub>18</sub>H<sub>32</sub>O<sub>4</sub>, [ $\alpha$ ]<sub>D</sub><sup>25</sup> -13.1 (c 0.3, CHCl<sub>3</sub>), HR-ESI-MS  $m/z$ : 335.2121  
 42 [M+Na]<sup>+</sup> (calcd. for C<sub>18</sub>H<sub>32</sub>O<sub>4</sub>Na : 335.2198); IR (transmission)  $\nu_{\text{MAX}}$  3457, 1727 cm<sup>-1</sup>. <sup>1</sup>H-  
 43 NMR (400 MHz, CDCl<sub>3</sub>)  $\delta$ : 7.08 (1H, t,  $J = 7.5$  Hz, H-6), 4.90 (1H, s, H-3), 4.02 (1H, s,  
 44 3-OH), 3.73 (3H, s, 1-OCH<sub>3</sub>), 2.35 (2H, q,  $J = 7.5$  Hz, H-7), 2.15 (3H, s, H-5), 1.51 (2H,  
 45 m, H-8), 1.25 (16H, br s, H-9 ~ H-16), 0.87 (3H, t,  $J = 6.8$  Hz, H-17). <sup>13</sup>C-NMR (100 MHz,

46 CDCl<sub>3</sub>)  $\delta$ : 206.5 (C-4), 166.6 (C-1), 149.2 (C-6), 129.7 (C-2), 73.3 (C-3), 52.0 (1-OCH<sub>3</sub>),  
47 31.8 ~ 29.3\* (C-9 ~ C-16), 28.8 (C-8), 28.6(C-7), 24.7 (C-5), 14.0 (C-17).

48 **Secomahubaolide**, C<sub>24</sub>H<sub>44</sub>O<sub>4</sub>; [ $\alpha$ ]<sub>D</sub><sup>25</sup> -11.3 (c 0.2, CHCl<sub>3</sub>); HR-ESI-MS  $m/z$  397.2393  
49 [M+H]<sup>+</sup> (calcd. for C<sub>24</sub>H<sub>45</sub>O<sub>4</sub> : 397.3318); IR (transmission)  $\nu_{\text{MAX}}$  3445, 1732 cm<sup>-1</sup>. <sup>1</sup>H-  
50 NMR (400 MHz, DMSO- *d*<sub>6</sub>)  $\delta$ : 6.82 (1H, t, *J* = 7.2 Hz, H-6), 5.42 (1H, s, 3-OH), 2.26  
51 (2H, q, *J* = 7.2 Hz, H-7), 2.11 (3H, s, H-5), 4.84 (1H, s, H-3), 3.61 (3H, s, 1-OCH<sub>3</sub>), 1.41  
52 (2H, m, H-8), 1.24 (28H, br s, H-9 ~ H-22), 0.85 (3H, t, *J* = 6.2 Hz, H-21). <sup>13</sup>C-NMR  
53 (100MHz, DMSO-*d*<sub>6</sub>)  $\delta$ : 208.9 (C-4), 166.2 (C-1), 146.8 (C-6), 132.0 (C-2), 72.2 (C-3),  
54 51.6 (1-OCH<sub>3</sub>), 29.0 ~ 28.7\* (C-9 ~ C-22), 28.1 (C-8), 27.9 (C-7), 25.8 (C-5), 13.9 (C-23).

55 \*Overlapped signals.

56 **Western blot analysis.** Liver, lung, heart, kidney and spleen of mouse were removed right  
57 after animal experiment. The extracted tissues were pulverized through a tissue grinder  
58 pestle and homogenized by adding CETi lysis buffer (Translab, Daejeon, Korea). The  
59 homogeneous liquid was centrifuged at 13,000 rpm at -4°C to obtain a supernatant (Ishii  
60 et al., 2004). The supernatant was boiled for 5 min with the Laemmli sample buffer and  
61 resolved by 7.5% sodium dodecyl sulfate polyacrylamide gel electrophoresis (SDS-PAGE).  
62 Proteins were transferred electrophoretically to a polyvinylidene fluoride (PVDF)  
63 membrane (ATTO Corp., Tokyo, Japan) for 80 min at 120 mA. After blocking with TBS-  
64 T (10 mM Tris, 150 mM NaCl, 0.1% Tween-20, pH 7.6) containing 5% bovine serum  
65 albumin (BSA) for 1 h, the membranes were then incubated with a 1:1000 dilution of  
66 primary antibodies targeting the following; poly (ADP-ribose) polymerase (PARP),  
67 caspase-3 and  $\beta$ -actin (all from Cell Signaling Technology, Inc.). The primary antibody  
68 was removed, and the blots were washed three times in TBS-T. Blots were then incubated

with anti-rabbit antibody (AbFrontier, Seoul, Korea) diluted 1:2000 in TBS containing 5% BSA for 5 h at 4°C and then washed five times in TBS-T. Antibody-bound proteins were detected using enhanced chemiluminescence (AbFrontier, Seoul, Korea) and imaging systems (Bio-Rad, Hercules, CA, USA) according to the manufacturer's instructions. The expression level of each protein was normalized to  $\beta$ -actin and the intensities of the bands were quantified using Quantity One (Bio-Rad).

## FIGURES and FIGURE LEGENDS

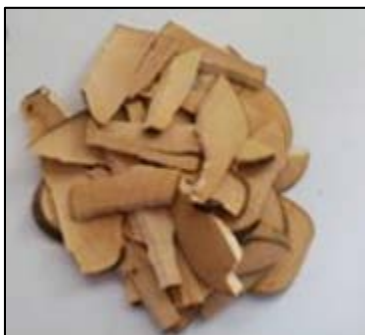

**SUPPLEMENTARY FIGURE 1. The stems of *L. obtusiloba*.**

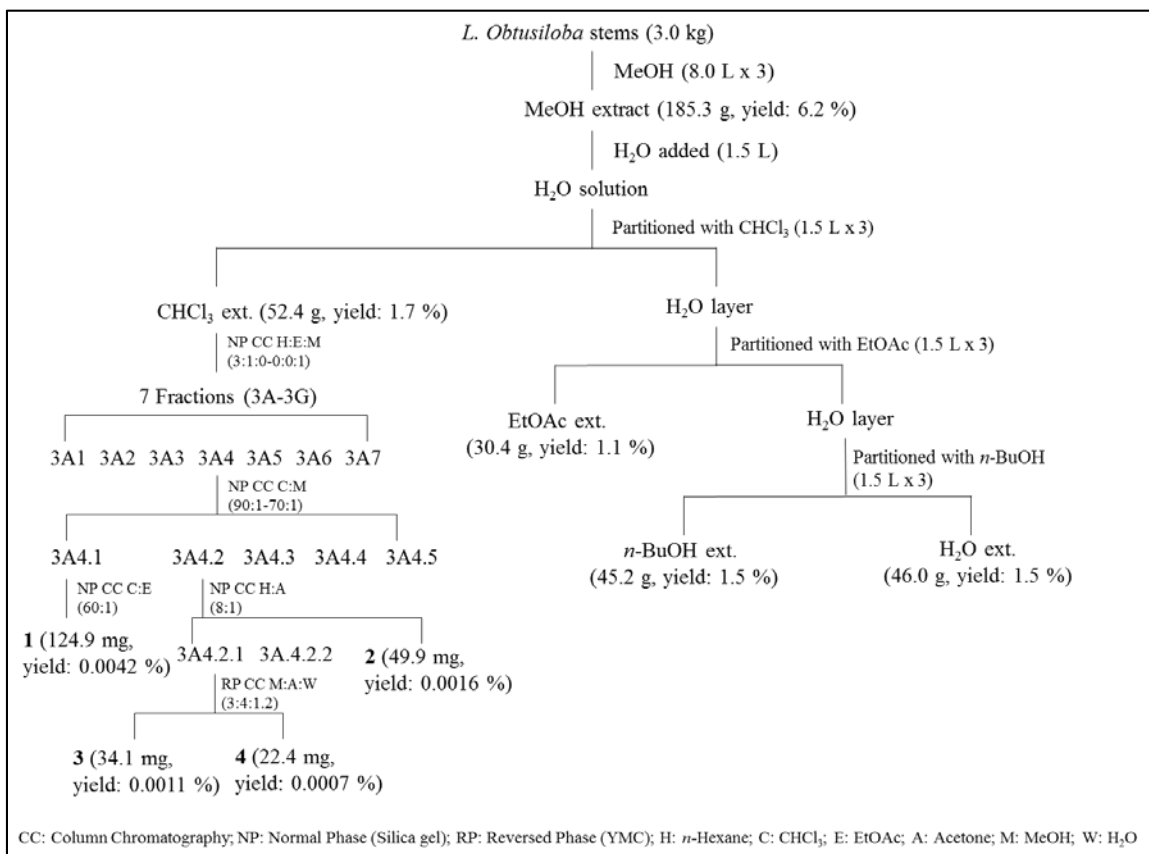

**SUPPLEMENTARY FIGURE 2. Isolation scheme of compounds 1-4.**

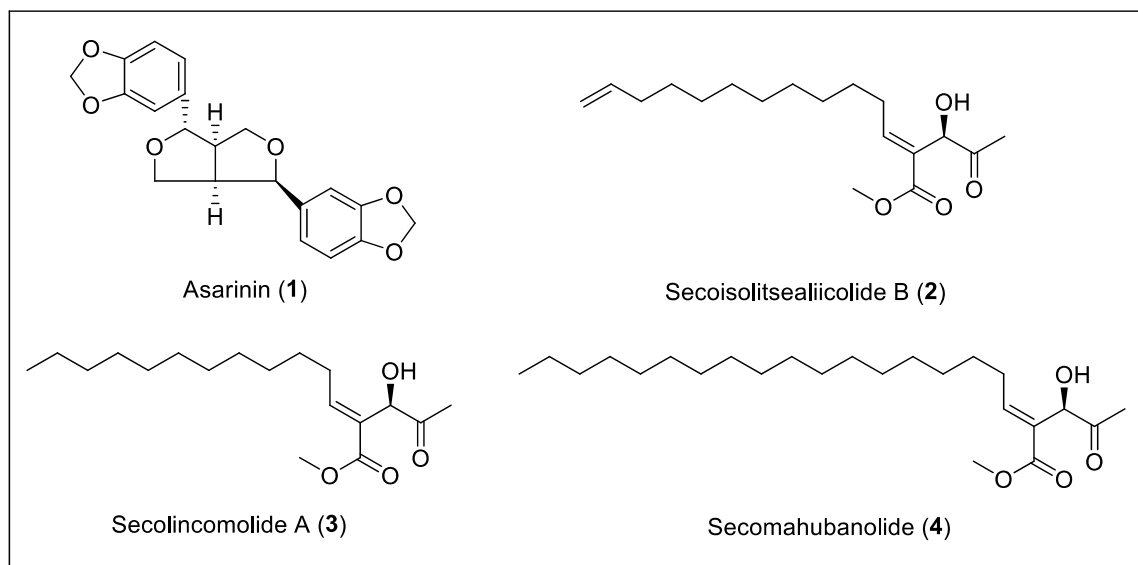

**SUPPLEMENTARY FIGURE 3. The chemical structures of isolated compounds from the  $\text{CHCl}_3$  extracts of *L. obtusiloba*.** The structures are elucidated as asarinin (1), secoisolitsealiicolide B (2), secolincomolide A (3), and secomahubanolide (4).

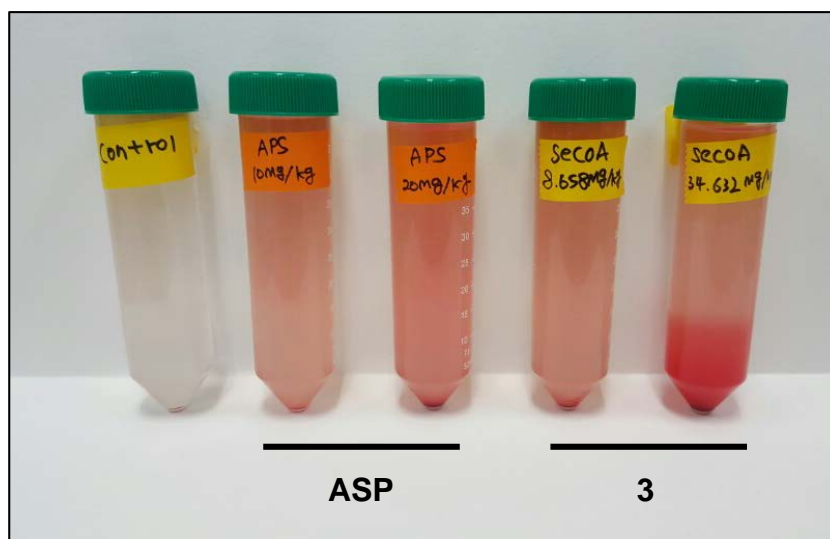

**SUPPLEMENTARY FIGURE 4. The effect of secolincomolide A (3) on tail bleeding.**

Image shows the amount of blood in saline (37°C) after tail bleeding assay in mice treated with control (saline), secolincomolide A (Seco A, 8.7 and 34.6 mg/kg), or aspirin

93 (ASP, 10 and 20 mg/kg) as described in Materials and Methods section (time < 1200 s, n  
 94 = 3-5 mice in each group).

95

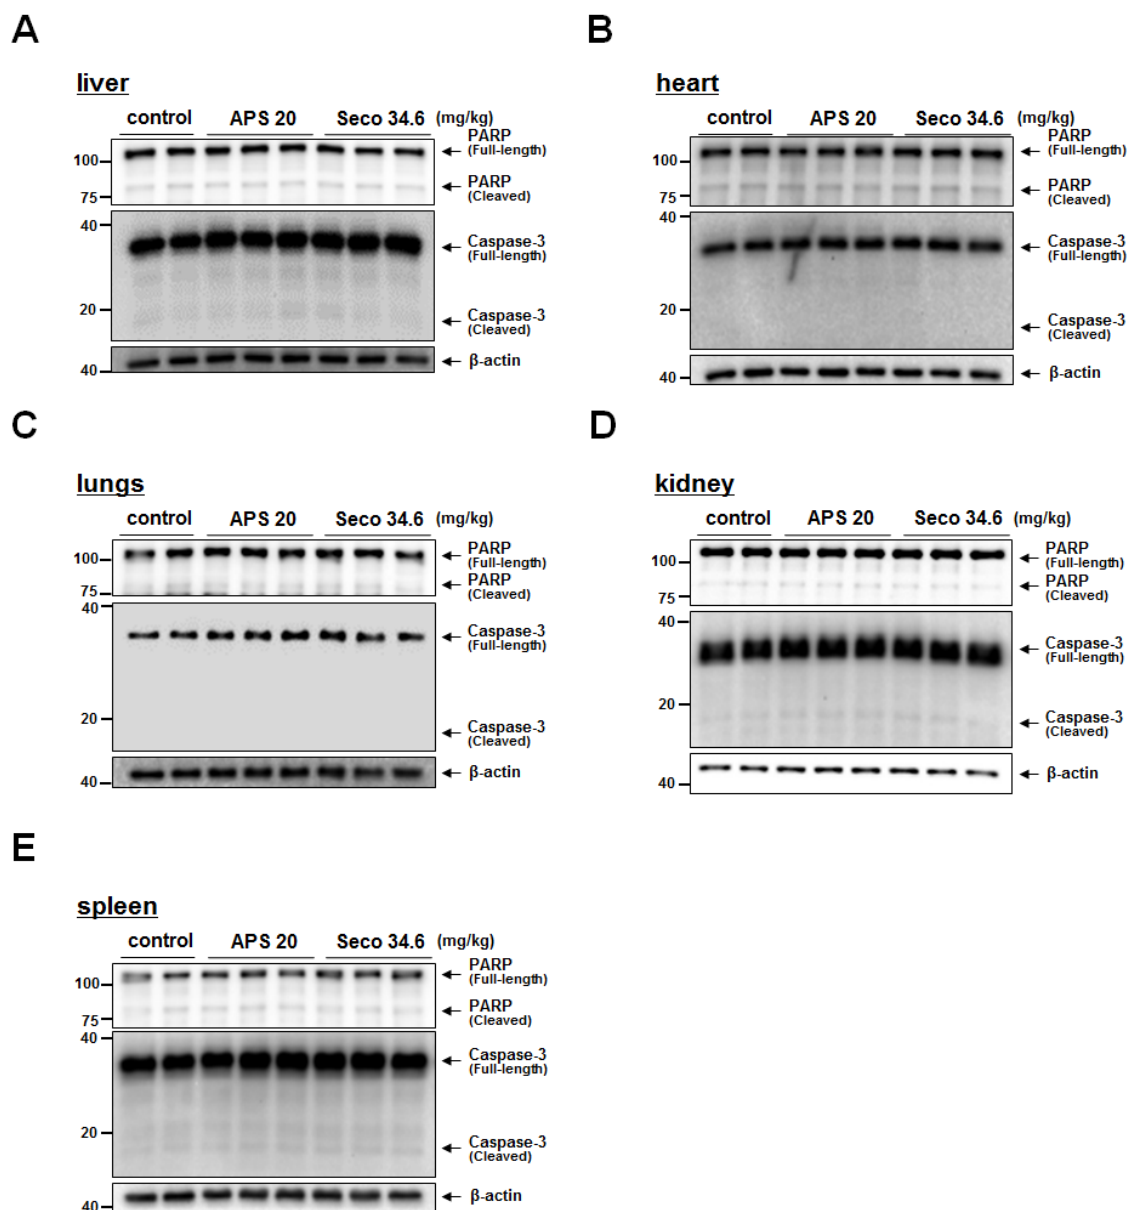

96

97 **SUPPLEMENTARY FIGURE 5. Evaluation of organ toxicity after administration of**  
 98 **high-dose secolincomolide A and aspirin.** Tissue lysates were collected from heart, lung,  
 99 liver, spleen, and kidney of the mice administered with high concentration of

100 secolincomolide A (Seco) and aspirin (ASP), and dissolved using sodium dodecyl sulfate  
101 polyacrylamide gel electrophoresis (SDS-PAGE). Western blotting using primary  
102 antibodies targeting anti-poly (ADP-ribose) polymerase (PARP) and –caspase-3 was  
103 performed to assess organ toxicity. The expression level of each protein was normalized to  
104  $\beta$ -actin. Control indicates no treatment.

## 105 **References**

106  
107 Ishii, I., Akahoshi, N., Yu, X.N., Kobayashi, Y., Namekata, K., Komaki, G., et al. (2004).  
108 Murine cystathionine  $\gamma$ -lyase: complete cDNA and genomic sequences, promoter  
109 activity, tissue distribution and developmental expression. *Biochem. J.* 381(Pt 1),  
110 113-123. doi: 10.1042/BJ20040243  
111
